# Supplementary material
Source: ML conference proceedings conference paper supplement (https://proceedings.neurips.cc/paper_files/paper/2023/hash/5c46ae130105fa012da0446126c01d1d-Abstract.html)
Supplement: Supplementary file 1 [file 5c46ae130105fa012da0446126c01d1d-Supplemental-Conference.pdf]

|     |                                                                  |           |
|-----|------------------------------------------------------------------|-----------|
| 307 | <b>Table of Contents</b>                                         |           |
| 308 | <b>A PDE Symmetry Groups and Deriving Generators</b>             | <b>2</b>  |
| 309 | A.1 Symmetry Groups and Infinitesimal Invariance . . . . .       | 3         |
| 310 | A.2 Deriving Generators of the Symmetry Group of a PDE . . . . . | 4         |
| 311 | A.3 Example: Burgers' Equation . . . . .                         | 5         |
| 312 | <b>B Exponential map and its approximations</b>                  | <b>6</b>  |
| 313 | B.1 Approximations to the exponential map . . . . .              | 7         |
| 314 | <b>C VICReg Loss</b>                                             | <b>8</b>  |
| 315 | <b>D Expanded related works</b>                                  | <b>9</b>  |
| 316 | <b>E Details on Augmentations</b>                                | <b>10</b> |
| 317 | E.1 Burgers' equation . . . . .                                  | 10        |
| 318 | E.2 KdV . . . . .                                                | 11        |
| 319 | E.3 KS . . . . .                                                 | 12        |
| 320 | E.4 Navier Stokes . . . . .                                      | 12        |
| 321 | <b>F Experimental details</b>                                    | <b>12</b> |
| 322 | F.1 Experiments on Burgers' Equation . . . . .                   | 12        |
| 323 | F.2 Experiments on KdV and KS . . . . .                          | 14        |
| 324 | F.3 Experiments on Navier-Stokes . . . . .                       | 14        |

325 **Typo** There is a typo in Figure 5:  $g_1$  is translation applied in  $t$  (not  $x$ ), while  $g_2$  is translation applied  
 326 in  $x$  (not  $y$ ). Whenever applicable, we use the same strength in both  $x$  and  $y$  axis.

## 327 A PDE Symmetry Groups and Deriving Generators

328 Symmetry augmentations encourage invariance of the representations to known symmetry groups of  
 329 the data. The guiding principle is that inputs that can be obtained from one another via transformations  
 330 of the symmetry group should share a common representation. In images, such symmetries are known  
 331 *a priori* and correspond to flips, resizing, or rotations of the input. In PDEs, these symmetry groups  
 332 can be derived as Lie groups, commonly denoted as Lie point symmetries, and have been categorized  
 333 for many common PDEs [11]. An example of the form of such augmentations is given in Figure 6  
 334 for a simple PDE that rotates a point in 2-D space. In this example, the PDE exhibits both rotational  
 335 symmetry and scaling symmetry of the radius of rotation. For arbitrary PDEs, such symmetries can  
 336 be derived, as explained in more detail below.

**Example:** symmetries and invariances of

$$\frac{\partial y}{\partial t} = \alpha x \quad \frac{\partial x}{\partial t} = -\alpha y$$

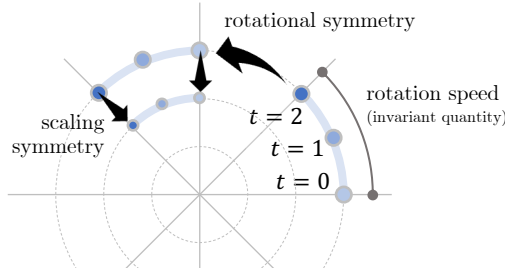

Figure 6: Illustration of the PDE symmetry group and invariances of a simple PDE, which rotates a point in 2-D space. The PDE symmetry group here corresponds to scalings of the radius of the rotation and fixed rotations of all the points over time. A sample invariant quantity is the rate of rotation (related to the parameter  $\alpha$  in the PDE), which is fixed for any solution to this PDE.

337 The Lie point symmetry groups of differential equations form a Lie group structure, where elements  
 338 of the groups are smooth and differentiable transformations. It is typically easier to derive the  
 339 symmetries of a system of differential equations via the infinitesimal generators of the symmetries,  
 340 (*i.e.*, at the level of the derivatives of the one parameter transforms). By using these infinitesimal  
 341 generators, one can replace *nonlinear* conditions for the invariance of a function under the group  
 342 transformation, with an equivalent *linear* condition of *infinitesimal* invariance under the respective  
 343 generator of the group action [11].

344 In what follows, we give an informal overview to the derivation of Lie point symmetries. Full details  
 345 and formal rigor can be obtained in Olver [11], Ibragimov [13], among others.

346 In the setting we consider, a differential equation has a set of  $p$  independent variables  $\mathbf{x} =$   
 347  $(x^1, x^2, \dots, x^p) \in \mathbb{R}^p$  and  $q$  dependent variables  $\mathbf{u} = (u^1, u^2, \dots, u^q) \in \mathbb{R}^q$ . The solutions  
 348 take the form  $\mathbf{u} = f(\mathbf{x})$ , where  $u^\alpha = f^\alpha(\mathbf{x})$  for  $\alpha \in \{1, \dots, q\}$ . Solutions form a graph over a  
 349 domain  $\Omega \subset \mathbb{R}^p$ :

$$\Gamma_f = \{(\mathbf{x}, f(\mathbf{x})) : \mathbf{x} \in \Omega\} \subset \mathbb{R}^p \times \mathbb{R}^q. \quad (10)$$

350 In other words, a given solution  $\Gamma_f$  forms a  $p$ -dimensional submanifold of the space  $\mathbb{R}^p \times \mathbb{R}^q$ .

351 The  $n$ -th **prolongation** of a given smooth function  $\Gamma_f$  expands or “prolongs” the graph of the solution  
 352 into a larger space to include derivatives up to the  $n$ -th order. More precisely, if  $\mathcal{U} = \mathbb{R}^q$  is the  
 353 solution space of a given function and  $f : \mathbb{R}^p \rightarrow \mathcal{U}$ , then we introduce the Cartesian product space of  
 354 the prolongation:

$$\mathcal{U}^{(n)} = \mathcal{U} \times \mathcal{U}_1 \times \mathcal{U}_2 \times \dots \times \mathcal{U}_n, \quad (11)$$

355 where  $\mathcal{U}_k = \mathbb{R}^{\dim(k)}$  and  $\dim(k) = \binom{p+k-1}{k}$  is the dimension of the so-called *jet space* consisting  
 356 of all  $k$ -th order derivatives. Given any solution  $f : \mathbb{R}^p \rightarrow \mathcal{U}$ , the prolongation can be calculated by

357 simply calculating the corresponding derivatives up to order  $n$  (e.g., via a Taylor expansion at each  
 358 point). For a given function  $\mathbf{u} = f(\mathbf{x})$ , the  $n$ -th prolongation is denoted as  $\mathbf{u}^{(n)} = \text{pr}^{(n)} f(\mathbf{x})$ . As a  
 359 simple example, for the case of  $p = 2$  with independent variables  $x$  and  $y$  and  $q = 1$  with a single  
 360 dependent variable  $f$ , the second prolongation is

$$\begin{aligned} \mathbf{u}^{(2)} = \text{pr}^{(2)} f(x, y) &= (u; u_x, u_y; u_{xx}, u_{xy}, u_{yy}) \\ &= \left( f; \frac{\partial f}{\partial x}, \frac{\partial f}{\partial y}; \frac{\partial^2 f}{\partial x^2}, \frac{\partial^2 f}{\partial x \partial y}, \frac{\partial^2 f}{\partial y^2} \right) \in \mathbb{R}^1 \times \mathbb{R}^2 \times \mathbb{R}^3, \end{aligned} \quad (12)$$

361 which is evaluated at a given point  $(x, y)$  in the domain. The complete space  $\mathbb{R}^p \times \mathcal{U}^{(n)}$  is often  
 362 called the  $n$ -th order jet space [11].

363 A system of differential equations is a set of  $l$  differential equations  $\Delta : \mathbb{R}^p \times \mathcal{U}^{(n)} \rightarrow \mathbb{R}^l$  of the  
 364 independent and dependent variables with dependence on the derivatives up to a maximum order of  
 365  $n$ :

$$\Delta_\nu(\mathbf{x}, \mathbf{u}^{(n)}) = 0, \quad \nu = 1, \dots, l. \quad (13)$$

366 A smooth solution is thus a function  $f$  such that for all points in the domain of  $\mathbf{x}$ :

$$\Delta_\nu(\mathbf{x}, \text{pr}^{(n)} f(\mathbf{x})) = 0, \quad \nu = 1, \dots, l. \quad (14)$$

367 In geometric terms, the system of differential equations states where the given map  $\Delta$  vanishes on  
 368 the jet space, and forms a subvariety

$$Z_\Delta = \{(\mathbf{x}, \mathbf{u}^{(n)}) : \Delta(\mathbf{x}, \mathbf{u}^{(n)}) = 0\} \subset \mathbb{R}^p \times \mathcal{U}^{(n)}. \quad (15)$$

369 Therefore to check if a solution is valid, one can check if the prolongation of the solution falls within  
 370 the subvariety  $Z_\Delta$ . As an example, consider the one dimensional heat equation

$$\Delta = u_t - cu_{xx} = 0. \quad (16)$$

371 We can check that  $f(x, t) = \sin(x)e^{-ct}$  is a solution by forming its prolongation and checking if it  
 372 falls within the subvariety given by the above equation:

$$\begin{aligned} \text{pr}^{(2)} f(x, t) &= (\sin(x)e^{-ct}; \cos(x)e^{-ct}, -c\sin(x)e^{-ct}; -\sin(x)e^{-ct}, -c\cos(x)e^{-ct}, c^2\sin(x)e^{-ct}), \\ \Delta(x, t, \mathbf{u}^{(2)}) &= -c\sin(x)e^{-ct} + c\sin(x)e^{-ct} = 0. \end{aligned} \quad (17)$$

### 373 A.1 Symmetry Groups and Infinitesimal Invariance

374 A symmetry group  $G$  for a system of differential equations is a set of local transformations to  
 375 the function which transform one solution of the system of differential equations to another. The  
 376 group takes the form of a Lie group, where group operations can be expressed as a composition of  
 377 one-parameter transforms. More rigorously, given the graph of a solution  $\Gamma_f$  as defined in Eq. (10), a  
 378 group operation  $g \in G$  maps this graph to a new graph

$$g \cdot \Gamma_f = \{(\tilde{\mathbf{x}}, \tilde{\mathbf{u}}) = g \cdot (\mathbf{x}, \mathbf{u}) : (\mathbf{x}, \mathbf{u}) \in \Gamma_f\}, \quad (18)$$

where  $(\tilde{\mathbf{x}}, \tilde{\mathbf{u}})$  label the new coordinates of the solution in the set  $g \cdot \Gamma_f$ . For example, if  $\mathbf{x} = (x, t)$ ,  
 $\mathbf{u} = u(x, t)$ , and  $g$  acts on  $(\mathbf{x}, \mathbf{u})$  via

$$(x, t, u) \mapsto (x + \epsilon t, t, u + \epsilon),$$

379 then  $\tilde{u}(\tilde{x}, \tilde{t}) = u(x, t) + \epsilon = u(\tilde{x} - \epsilon \tilde{t}, \tilde{t}) + \epsilon$ , where  $(\tilde{x}, \tilde{t}) = (x + \epsilon t, t)$ .

380 Note, that the set  $g \cdot \Gamma_f$  may not necessarily be a graph of a new  $\mathbf{x}$ -valued function; however, since  
 381 all transformations are local and smooth, one can ensure transformations are valid in some region  
 382 near the identity of the group.

383 As an example, consider the following transformations which are members of the symmetry group of  
 384 the differential equation  $u_{xx} = 0$ .  $g_1(t)$  translates a single spatial coordinate  $x$  by an amount  $t$  and  $g_2$   
 385 scales the output coordinate  $u$  by an amount  $e^r$ :

$$\begin{aligned} g_1(t) \cdot (x, u) &= (x + t, u), \\ g_2(r) \cdot (x, u) &= (x, e^r \cdot u). \end{aligned} \quad (19)$$

386 It is easy to verify that both of these operations are local and smooth around a region of the identity,  
 387 as sending  $r, t \rightarrow 0$  recovers the identity operation. Lie theory allows one to equivalently describe  
 388 the potentially nonlinear group operations above with corresponding infinitesimal generators of the  
 389 group action, corresponding to the Lie algebra of the group. Infinitesimal generators form a vector  
 390 field over the total space  $\Omega \times \mathcal{U}$ , and the group operations correspond to integral flows over that  
 391 vector field. To map from a single parameter Lie group operation to its corresponding infinitesimal  
 392 generator, we take the derivative of the single parameter operation at the identity:

$$\mathbf{v}_g|_{(x,u)} = \left. \frac{d}{dt} g(t) \cdot (x, u) \right|_{t=0}, \quad (20)$$

393 where  $g(0) \cdot (x, u) = (x, u)$ .

394 To map from the infinitesimal generator back to the corresponding group operation, one can apply  
 395 the exponential map

$$\exp(tv) \cdot (x, u) = g(t) \cdot (x, u), \quad (21)$$

396 where  $\exp : \mathfrak{g} \rightarrow G$ . Here,  $\exp(\cdot)$  maps from the Lie algebra,  $\mathfrak{g}$ , to the corresponding Lie group,  
 397  $G$ . This exponential map can be evaluated using various methods, as detailed in Appendix B and  
 398 Appendix E.

399 Returning to the example earlier from Equation (19), the corresponding Lie algebra elements are

$$\begin{aligned} \mathbf{v}_{g_1} &= \partial_x \leftrightarrow g_1(t) \cdot (x, u) = (x + t, u), \\ \mathbf{v}_{g_2} &= u\partial_u \leftrightarrow g_2(r) \cdot (x, u) = (x, e^r \cdot u). \end{aligned} \quad (22)$$

400 Informally, Lie algebras help simplify notions of invariance as it allows one to check whether  
 401 functions or differential equations are invariant to a group by needing only to check it at the level  
 402 of the derivative of that group. In other words, for any vector field corresponding to a Lie algebra  
 403 element, a given function is invariant to that vector field if the action of the vector field on the given  
 404 function evaluates to zero everywhere. Thus, given a symmetry group, one can determine a set  
 405 of invariants using the vector fields corresponding to the infinitesimal generators of the group. To  
 406 determine whether a differential equation is in such a set of invariants, we extend the definition of a  
 407 prolongation to act on vector fields as

$$\text{pr}^{(n)} \mathbf{v}|_{(x, \mathbf{u}^{(n)})} = \left. \frac{d}{d\epsilon} \right|_{\epsilon=0} \text{pr}^{(n)} [\exp(\epsilon \mathbf{v})] (x, \mathbf{u}^{(n)}). \quad (23)$$

408 A given vector field  $\mathbf{v}$  is therefore an infinitesimal generator of a symmetry group  $G$  of a system  
 409 of differential equations  $\Delta_\nu$ , indexed by  $\nu \in \{1, \dots, l\}$  if the prolonged vector field of any given  
 410 solution is still a solution:

$$\text{pr}^{(n)} \mathbf{v}[\Delta_\nu(x, \mathbf{u}^{(n)})] = 0, \quad \nu = 1, \dots, l, \quad \text{whenever } \Delta(x, \mathbf{u}^{(n)}) = 0. \quad (24)$$

411 For sake of convenience and brevity, we leave out many of the formal definitions behind these  
 412 concepts and refer the reader to [11] for complete details.

## 413 A.2 Deriving Generators of the Symmetry Group of a PDE

414 Since symmetries of differential equations correspond to smooth maps, it is typically easier to derive  
 415 the particular symmetries of a differential equation via their infinitesimal generators. To derive such  
 416 generators, we first show how to perform the prolongation of a vector field. As before, assume we  
 417 have  $p$  independent variables  $x^1, \dots, x^p$  and  $l$  dependent variables  $u^1, \dots, u^l$ , which are a function  
 418 of the dependent variables. Note that we use superscripts to denote a particular variable. Derivatives  
 419 with respect to a given variable are denoted via subscripts corresponding to the indices. For example,  
 420 the variable  $u_{112}^1$  denotes the third order derivative of  $u^1$  taken twice with respect to the variable  $x^1$   
 421 and once with respect to  $x^2$ . As stated earlier, the prolongation of a vector field is defined as the  
 422 operation

$$\text{pr}^{(n)} \mathbf{v}|_{(x, \mathbf{u}^{(n)})} = \left. \frac{d}{d\epsilon} \right|_{\epsilon=0} \text{pr}^{(n)} [\exp(\epsilon \mathbf{v})] (x, \mathbf{u}^{(n)}). \quad (25)$$

423 To calculate the above, we can evaluate the formula on a vector field written in a generalized form.  
 424 *I.e.*, any vector field corresponding to the infinitesimal generator of a symmetry takes the general  
 425 form

$$\mathbf{v} = \sum_{i=1}^p \xi^i(\mathbf{x}, \mathbf{u}) \frac{\partial}{\partial x^i} + \sum_{\alpha=1}^q \phi_\alpha(\mathbf{x}, \mathbf{u}) \frac{\partial}{\partial u^\alpha}. \quad (26)$$

426 Throughout, we will use Greek letter indices for dependent variables and standard letter indices for  
 427 independent variables. Then, we have that

$$\text{pr}^{(n)} \mathbf{v} = \mathbf{v} + \sum_{\alpha=1}^q \sum_{\mathbf{J}} \phi_\alpha^{\mathbf{J}}(\mathbf{x}, \mathbf{u}^{(n)}) \frac{\partial}{\partial u_{\mathbf{J}}^\alpha}, \quad (27)$$

428 where  $\mathbf{J}$  is a tuple of dependent variables indicating which variables are in the derivative of  $\frac{\partial}{\partial u_{\mathbf{J}}^\alpha}$ .

429 Each  $\phi_\alpha^{\mathbf{J}}(\mathbf{x}, \mathbf{u}^{(n)})$  is calculated as

$$\phi_\alpha^{\mathbf{J}}(\mathbf{x}, \mathbf{u}^{(n)}) = \prod_{i \in \mathbf{J}} D_i \left( \phi_\alpha - \sum_{i=1}^p \xi^i u_i^\alpha \right) + \sum_{i=1}^p \xi^i u_{\mathbf{J},i}^\alpha, \quad (28)$$

430 where  $u_{\mathbf{J},i}^\alpha = \partial u_{\mathbf{J}}^\alpha / \partial x^i$  and  $D_i$  is the total derivative operator with respect to variable  $i$  defined as

$$D_i P(x, u^{(n)}) = \frac{\partial P}{\partial x^i} + \sum_{i=1}^q \sum_{\mathbf{J}} u_{\mathbf{J},i}^\alpha \frac{\partial P}{\partial u_{\mathbf{J}}^\alpha}. \quad (29)$$

431 After evaluating the coefficients,  $\phi_\alpha^{\mathbf{J}}(\mathbf{x}, \mathbf{u}^{(n)})$ , we can substitute these values into the definition of  
 432 the vector field's prolongation in Equation (27). This fully describes the infinitesimal generator of  
 433 the given PDE, which can be used to evaluate the necessary symmetries of the system of differential  
 434 equations. An example for Burgers' equation, a canonical PDE, is presented in the following.

### 435 A.3 Example: Burgers' Equation

436 Burgers' equation is a PDE used to describe convection-diffusion phenomena commonly observed  
 437 in fluid mechanics, traffic flow, and acoustics [41]. The PDE can be written in either its "potential"  
 438 form or its "viscous" form. The potential form is

$$u_t = u_{xx} + u_x^2. \quad (30)$$

439 **Cautionary note:** We derive here the symmetries of Burgers' equation in its potential form since this  
 440 form is more convenient and simpler to study for the sake of an example. The equation we consider  
 441 in our experiments is the more commonly studied Burgers' equation in its standard form which does  
 442 not have the same Lie symmetry group (see Table 3). Similar derivations for Burgers' equation in its  
 443 standard form can be found in example 6.1 of [42].

444 Following the notation from the previous section,  $p = 2$  and  $q = 1$ . Consequently, the symmetry  
 445 group of Burgers' equation will be generated by vector fields of the following form

$$\mathbf{v} = \xi(x, t, u) \frac{\partial}{\partial x} + \tau(x, t, u) \frac{\partial}{\partial t} + \phi(x, t, u) \frac{\partial}{\partial u}, \quad (31)$$

446 where we wish to determine all possible coefficient functions,  $\xi(x, t, u)$ ,  $\tau(x, t, u)$ , and  $\phi(x, t, u)$   
 447 such that the resulting one-parameter sub-group  $\exp(\varepsilon \mathbf{v})$  is a symmetry group of Burgers' equation.

448  
 449 To evaluate these coefficients, we need to prolong the vector field up to 2<sup>nd</sup> order, given  
 450 that the highest-degree derivative present in the governing PDE is of order 2. The 2<sup>nd</sup> prolongation  
 451 of the vector field can be expressed as

$$\text{pr}^{(2)} \mathbf{v} = \mathbf{v} + \phi^x \frac{\partial}{\partial u_x} + \phi^t \frac{\partial}{\partial u_t} + \phi^{xx} \frac{\partial}{\partial u_{xx}} + \phi^{xt} \frac{\partial}{\partial u_{xt}} + \phi^{tt} \frac{\partial}{\partial u_{tt}}. \quad (32)$$

452 Applying this prolonged vector field to the differential equation in Equation (30), we get the infinitesimal  
 453 symmetry criteria that

$$\text{pr}^{(2)} \mathbf{v}[\Delta(x, t, \mathbf{u}^{(2)})] = \phi^t - \phi^{xx} + 2u_x \phi^x = 0. \quad (33)$$

454 To evaluate the individual coefficients, we apply Equation (28). Next, we substitute every instance  
 455 of  $u_t$  with  $u_x^2 + u_{xx}$ , and equate the coefficients of each monomial in the first and second-order  
 456 derivatives of  $u$  to find the pertinent symmetry groups. Table 2 below lists the relevant monomials as  
 well as their respective coefficients.

Table 2: Monomial coefficients in vector field prolongation for Burgers' equation.

| Monomial       | Coefficient                                                                 |
|----------------|-----------------------------------------------------------------------------|
| 1              | $\phi_t = \phi_{xx}$                                                        |
| $u_x$          | $2\phi_x + 2(\phi_{xu} - \xi_{xx}) = -\xi_t$                                |
| $u_x^2$        | $2(\phi_u - \xi_x) - \tau_{xx} + (\phi_{uu} - 2\xi_{xu}) = \phi_u - \tau_t$ |
| $u_x^3$        | $-2\tau_x - 2\xi_u - 2\tau_{xu} - \xi_{uu} = -\xi_u$                        |
| $u_x^4$        | $-2\tau_u - \tau_{uu} = -\tau_u$                                            |
| $u_{xx}$       | $-\tau_{xx} + (\phi_u - 2\xi_x) = \phi_u - \tau_t$                          |
| $u_x u_{xx}$   | $-2\tau_x - 2\tau_{xu} - 3\xi_u = -\xi_u$                                   |
| $u_x^2 u_{xx}$ | $-2\tau_u - \tau_{uu} - \tau_u = -2\tau_u$                                  |
| $u_{xx}^2$     | $-\tau_u = -\tau_u$                                                         |
| $u_{xt}$       | $-2\tau_x = 0$                                                              |
| $u_x u_{xt}$   | $-2\tau_u = 0$                                                              |

457

458 Using these relations, we can solve for the coefficient functions. For the case of Burgers' equation,  
 459 the most general infinitesimal symmetries have coefficient functions of the following form:

$$\xi(t, x) = k_1 + k_4 x + 2k_5 t + 4k_6 x t \quad (34)$$

460

$$\tau(t) = k_2 + 2k_4 t + 4k_6 t^2 \quad (35)$$

461

$$\phi(t, x, u) = (k_3 - k_5 x - 2k_6 t - k_6 x^2)u + \gamma(x, t) \quad (36)$$

462 where  $k_1, \dots, k_6 \in \mathbb{R}$  and  $\gamma(x, t)$  is an arbitrary solution to Burgers' equation. These coefficient  
 463 functions can be used to generate the infinitesimal symmetries. These symmetries are spanned by the  
 464 six vector fields below:

$$\mathbf{v}_1 = \partial_x \quad (37)$$

465

$$\mathbf{v}_2 = \partial_t \quad (38)$$

466

$$\mathbf{v}_3 = \partial_u \quad (39)$$

467

$$\mathbf{v}_4 = x\partial_x + 2t\partial_t \quad (40)$$

468

$$\mathbf{v}_5 = 2t\partial_x - x\partial_u \quad (41)$$

469

$$\mathbf{v}_6 = 4xt\partial_x + 4t^2\partial_t - (x^2 + 2t)\partial_u \quad (42)$$

470 as well as the infinite-dimensional subalgebra:  $\mathbf{v}_\gamma = \gamma(x, t)e^{-u}\partial_u$ . Here,  $\gamma(x, t)$  is any arbitrary  
 471 solution to the heat equation. The relationship between the Heat equation and Burgers' equation can  
 472 be seen, whereby if  $u$  is replaced by  $w = e^u$ , the Cole–Hopf transformation is recovered.

## 473 B Exponential map and its approximations

474 As observed in the previous section, symmetry groups are generally derived in the Lie algebra of  
 475 the group. The exponential map can then be applied, taking elements of this Lie algebra to the  
 476 corresponding group operations. Working within the Lie algebra of a group provides several benefits.  
 477 First, a Lie algebra is a vector space, so elements of the Lie algebra can be added and subtracted  
 478 to yield new elements of the Lie algebra (and the group, via the exponential map). Second, when  
 479 generators of the Lie algebra are closed under the Lie bracket of the Lie algebra (*i.e.*, the generators  
 480 form a basis for the structure constants of the Lie algebra), any arbitrary Lie point symmetry can be  
 481 obtained via an element of the Lie algebra (*i.e.* the exponential map is surjective onto the connected  
 482 component of the identity) [11]. In contrast, composing group operations in an arbitrary, *fixed*  
 483 sequence is not guaranteed to be able to generate any element of the group. Lastly, although not  
 484 extensively detailed here, the "strength," or magnitude, of Lie algebra elements can be measured

485 using an appropriately selected norm. For instance, the operator norm of a matrix could be used for  
 486 matrix Lie algebras.

487 In certain cases, especially when the element  $\mathbf{v}$  in the Lie algebra consists of a single basis element,  
 488 the exponential map  $\exp(\mathbf{v})$  applied to that element of the Lie algebra can be calculated explicitly.  
 489 Here, applying the group operation to a tuple of independent and dependent variables results in the so-  
 490 called Lie point transformation, since it is applied at a given point  $\exp(\epsilon\mathbf{v}) \cdot (x, f(x)) \mapsto (x', f(x)')$ .  
 491 Consider the concrete example below from Burger's equation.

492 **Example B.1** (Exponential map on symmetry generator of Burger's equation). *The Burger's equation*  
 493 *contains the Lie point symmetry*  $\mathbf{v}_\gamma = \gamma(x, t)e^{-u}\partial_u$  *with corresponding group transformation*  
 494  $\exp(\epsilon\mathbf{v}_\gamma) \cdot (x, t, u) = (x, t, \log(e^u + \epsilon\gamma))$ .

495 *Proof.* This transformation only changes the  $u$  component. Here, we have

$$\begin{aligned} \exp(\epsilon\gamma e^{-u}\partial_u) u &= u + \sum_{k=1}^n (\epsilon\gamma e^{-u}\partial_u)^k \cdot u \\ &= u + \epsilon\gamma e^{-u} - \frac{1}{2}\epsilon^2\gamma^2 e^{-2u} + \frac{1}{3}\epsilon^3\gamma^3 e^{-3u} + \dots \end{aligned} \quad (43)$$

496 Applying the series expansion  $\log(1+x) = x - \frac{x^2}{2} + \frac{x^3}{3} - \dots$ , we get

$$\begin{aligned} \exp(\epsilon\gamma e^{-u}\partial_u) u &= u + \log(1 + \epsilon\gamma e^{-u}) \\ &= \log(e^u) + \log(1 + \epsilon\gamma e^{-u}) \\ &= \log(e^u + \epsilon\gamma). \end{aligned} \quad (44)$$

497

□

498 In general, the output of the exponential map cannot be easily calculated as we did above, especially  
 499 if the vector field  $\mathbf{v}$  is a weighted sum of various generators. In these cases, we can still apply the  
 500 exponential map to a desired accuracy using efficient approximation methods, which we discuss next.

## 501 B.1 Approximations to the exponential map

502 For arbitrary Lie groups, computing the exact exponential map is often not feasible due to the  
 503 complex nature of the group and its associated Lie algebra. Hence, it is necessary to approximate the  
 504 exponential map to obtain useful results. Two common methods for approximating the exponential  
 505 map are the truncation of Taylor series and Lie-Trotter approximations.

506 **Taylor series approximation** Given a vector field  $\mathbf{v}$  in the Lie algebra of the group, the exponential  
 507 map can be approximated by truncating the Taylor series expansion of  $\exp(\mathbf{v})$ . The Taylor series  
 508 expansion of the exponential map is given by:

$$\exp(\mathbf{v}) = \text{Id} + \mathbf{v} + \frac{1}{2}\mathbf{v} \cdot \mathbf{v} + \dots = \sum_{n=0}^{\infty} \frac{\mathbf{v}^n}{n!}. \quad (45)$$

509 To approximate the exponential map, we retain a finite number of terms in the series:

$$\exp(\mathbf{v}) = \sum_{n=0}^k \frac{\mathbf{v}^n}{n!} + o(\|\mathbf{v}\|^k), \quad (46)$$

510 where  $k$  is the order of the truncation. The accuracy of the approximation depends on the number  
 511 of terms retained in the truncated series and the operator norm  $\|\mathbf{v}\|$ . For matrix Lie groups, where  
 512  $\mathbf{v}$  is also a matrix, this operator norm is equivalent to the largest magnitude of the eigenvalues of  
 513 the matrix [43]. The error associated with truncating the Taylor series after  $k$  terms thus decays  
 514 exponentially with the order of the approximation.

515 Two drawbacks exist when using the Taylor approximation. First, for a given vector field  $\mathbf{v}$ , applying  
 516  $\mathbf{v} \cdot f$  to a given function  $f$  requires algebraic computation of derivatives. Alternatively, derivatives

517 can also be approximated through finite difference schemes, but this would add an additional source  
 518 of error. Second, when using the Taylor series to apply a symmetry transformation of a PDE to a  
 519 starting solution of that PDE, the Taylor series truncation will result in a new function, which is not  
 520 necessarily a solution of the PDE anymore (although it can be made arbitrarily close to a solution by  
 521 increasing the truncation order). Lie-Trotter approximations, which we study next, approximate the  
 522 exponential map by a composition of symmetry operations, thus avoiding these two drawbacks.

523 **Lie-Trotter series approximations** The Lie-Trotter approximation is an alternative method for  
 524 approximating the exponential map, particularly useful when one has access to group elements  
 525 directly, i.e. the closed-form output of the exponential map on each Lie algebra generator), but they  
 526 are non-commutative. To provide motivation for this method, consider two elements  $\mathbf{X}$  and  $\mathbf{Y}$  in the  
 527 Lie algebra. The Lie-Trotter formula (or Lie product formula) approximates the exponential of their  
 528 sum [22, 44].

$$\exp(\mathbf{X} + \mathbf{Y}) = \lim_{n \rightarrow \infty} \left[ \exp\left(\frac{\mathbf{X}}{n}\right) \exp\left(\frac{\mathbf{Y}}{n}\right) \right]^n \approx \left[ \exp\left(\frac{\mathbf{X}}{k}\right) \exp\left(\frac{\mathbf{Y}}{k}\right) \right]^k, \quad (47)$$

529 where  $k$  is a positive integer controlling the level of approximation.

530 The first-order approximation above can be extended to higher orders, referred to as the Lie-Trotter-  
 531 Suzuki approximations. Though various different such approximations exist, we particularly use the  
 532 following recursive approximation scheme [45, 23] for a given Lie algebra component  $\mathbf{v} = \sum_{i=1}^p \mathbf{v}_i$ .

$$\begin{aligned} \mathcal{T}_2(\mathbf{v}) &= \exp\left(\frac{\mathbf{v}_1}{2}\right) \cdot \exp\left(\frac{\mathbf{v}_2}{2}\right) \cdots \exp\left(\frac{\mathbf{v}_p}{2}\right) \exp\left(\frac{\mathbf{v}_p}{2}\right) \cdot \exp\left(\frac{\mathbf{v}_{p-1}}{2}\right) \cdots \exp\left(\frac{\mathbf{v}_1}{2}\right), \\ \mathcal{T}_{2k}(\mathbf{v}) &= \mathcal{T}_{2k-2}(u_k \mathbf{v})^2 \cdot \mathcal{T}_{2k-2}((1 - 4u_k)\mathbf{v}) \cdot \mathcal{T}_{2k-2}(u_k \mathbf{v})^2, \\ u_k &= \frac{1}{4 - 4^{1/(2k-1)}}. \end{aligned} \quad (48)$$

533 To apply the above formula, we tune the order parameter  $p$  and split the time evolution into  $r$  segments  
 534 to apply the approximation  $\exp(\mathbf{v}) \approx \prod_{i=1}^r \mathcal{T}_p(\mathbf{v}/r)$ . For the  $p$ -th order, the number of stages in  
 535 the Suzuki formula above is equal to  $2 \cdot 5^{p/2-1}$ , so the total number of stages applied is equal to  
 536  $2r \cdot 5^{p/2-1}$ .

537 These methods are especially useful in the context of PDEs, as they allow for the approximation of  
 538 the exponential map while preserving the structure of the Lie algebra and group. Similar techniques  
 539 are used in the design of splitting methods for numerically solving PDEs [46, 47]. Crucially, these  
 540 approximations will always provide valid solutions to the PDEs, since each individual group operation  
 541 in the composition above is itself a symmetry of the PDE. This is in contrast with approximations via  
 542 Taylor series truncation, which only provide approximate solutions.

543 As with the Taylor series approximation, the  $p$ -th order approximation above is accurate to  $o(\|\mathbf{v}\|^p)$   
 544 with suitably selected values of  $r$  and  $p$  [23]. As a cautionary note, the approximations here may fail  
 545 to converge when applied to unbounded operators [48, 49]. In practice, we tested a range of bounds  
 546 to the augmentations and tuned augmentations accordingly (see Appendix E).

## 547 C VICReg Loss

548 In our implementations, we use the VICReg loss as our choice of SSL loss [9]. This loss contains  
 549 three different terms: a variance term that ensures representations do not collapse to a single point,  
 550 a covariance term that ensures different dimensions of the representation encode different data,  
 551 and an invariance term to enforce similarity of the representations for pairs of inputs related by an  
 552 augmentation. We go through each term in more detail below. Given a distribution  $\mathcal{T}$  from which to  
 553 draw augmentations and a set of inputs  $\mathbf{x}_i$ , the precise algorithm to calculate the VICReg loss for a  
 554 batch of data is also given in Algorithm 1.

555 Formally, define our embedding matrices as  $\mathbf{Z}, \mathbf{Z}' \in \mathbb{R}^{N \times D}$ . Next, we define the similarity criterion,  
 556  $\mathcal{L}_{\text{sim}}$ , as

$$\mathcal{L}_{\text{sim}}(\mathbf{u}, \mathbf{v}) = \|\mathbf{u} - \mathbf{v}\|_2^2,$$

557 which we use to match our embeddings, and to make them invariant to the transformations. To avoid  
 558 a collapse of the representations, we use the original variance and covariance criteria to define our



---

**Algorithm 1** VICReg Loss Evaluation

---

**Hyperparameters:**  $\lambda_{var}, \lambda_{cov}, \lambda_{inv}, \gamma \in \mathbb{R}$

**Input:**  $N$  inputs in a batch  $\{\mathbf{x}_i \in \mathbb{R}^{D_{in}}, i = 1, \dots, N\}$

**VICRegLoss**( $N, \mathbf{x}_i, \lambda_{var}, \lambda_{cov}, \lambda_{inv}, \gamma$ ):

1: Apply augmentations  $t, t' \sim \mathcal{T}$  to form embedding matrices  $\mathbf{Z}, \mathbf{Z}' \in \mathbb{R}^{N \times D}$ :

$$\mathbf{Z}_{i,:} = h_{\theta}(f_{\theta}(t \cdot \mathbf{x}_i)) \text{ and } \mathbf{Z}'_{i,:} = h_{\theta}(f_{\theta}(t' \cdot \mathbf{x}_i))$$

2: Form covariance matrices  $\text{Cov}(\mathbf{Z}), \text{Cov}(\mathbf{Z}') \in \mathbb{R}^{D \times D}$ :

$$\text{Cov}(\mathbf{Z}) = \frac{1}{N-1} \sum_{i=1}^N (\mathbf{Z}_{i,:} - \bar{\mathbf{Z}}_{i,:}) (\mathbf{Z}_{i,:} - \bar{\mathbf{Z}}_{i,:})^{\top}, \quad \bar{\mathbf{Z}}_{i,:} = \frac{1}{N} \sum_{i=1}^N \mathbf{Z}_{i,:}$$

3: Evaluate loss:  $\mathcal{L}(\mathbf{Z}, \mathbf{Z}') = \lambda_{var} \mathcal{L}_{var}(\mathbf{Z}, \mathbf{Z}') + \lambda_{cov} \mathcal{L}_{cov}(\mathbf{Z}, \mathbf{Z}') + \lambda_{inv} \mathcal{L}_{inv}(\mathbf{Z}, \mathbf{Z}')$

$$\mathcal{L}_{var}(\mathbf{Z}, \mathbf{Z}') = \frac{1}{D} \sum_{i=1}^N \max(0, \gamma - \sqrt{\text{Cov}(\mathbf{Z})_{ii}}) + \max(0, \gamma - \sqrt{\text{Cov}(\mathbf{Z}')_{ii}}),$$

$$\mathcal{L}_{cov}(\mathbf{Z}, \mathbf{Z}') = \frac{1}{D} \sum_{i,j=1, i \neq j}^N [\text{Cov}(\mathbf{Z})_{ij}]^2 + [\text{Cov}(\mathbf{Z}')_{ij}]^2,$$

$$\mathcal{L}_{inv}(\mathbf{Z}, \mathbf{Z}') = \frac{1}{N} \sum_{i=1}^N \|\mathbf{Z}_{i,:} - \mathbf{Z}'_{i,:}\|^2$$

4: **Return:**  $\mathcal{L}(\mathbf{Z}, \mathbf{Z}')$ 

---

559 regularisation loss,  $\mathcal{L}_{reg}$ , as

$$\begin{aligned} \mathcal{L}_{reg}(\mathbf{Z}) &= \lambda_{cov} C(\mathbf{Z}) + \lambda_{var} V(\mathbf{Z}), \quad \text{with} \\ C(\mathbf{Z}) &= \frac{1}{D} \sum_{i \neq j} \text{Cov}(\mathbf{Z})_{i,j}^2 \quad \text{and} \\ V(\mathbf{Z}) &= \frac{1}{D} \sum_{j=1}^D \max\left(0, 1 - \sqrt{\text{Var}(\mathbf{Z}_{:,j})}\right). \end{aligned}$$

560 The variance criterion,  $V(\mathbf{Z})$ , ensures that all dimensions in the representations are used, while also  
561 serving as a normalization of the dimensions. The goal of the covariance criterion is to decorrelate  
562 the different dimensions, and thus, spread out information across the embeddings.

563

564 The final criterion is

$$\mathcal{L}_{\text{VICReg}}(\mathbf{Z}, \mathbf{Z}') = \lambda_{inv} \frac{1}{N} \sum_{i=1}^N \mathcal{L}_{\text{sim}}(\mathbf{Z}_{i,inv}, \mathbf{Z}'_{i,inv}) + \mathcal{L}_{reg}(\mathbf{Z}') + \mathcal{L}_{reg}(\mathbf{Z}).$$

565 Hyperparameters  $\lambda_{var}, \lambda_{cov}, \lambda_{inv}, \gamma \in \mathbb{R}$  weight the contributions of different terms in the loss. For  
566 all studies conducted in this work, we use the default values of  $\lambda_{var} = \lambda_{inv} = 25$  and  $\lambda_{cov} = 1$ ,  
567 unless specified. In our experience, these default settings perform generally well.

## 568 D Expanded related works

569 **Machine Learning for PDEs** Recent work on machine learning for PDEs has considered both  
570 invariant prediction tasks [50] and time-series modelling [51, 52]. In the fluid mechanics setting,  
571 models learn dynamic viscosities, fluid densities, and/or pressure fields from both simulation and  
572 real-world experimental data [53, 54, 55]. For time-dependent PDEs, prior work has investigated the  
573 efficacy of convolutional neural networks (CNNs), recurrent neural networks (RNNs), graph neural

574 networks (GNNs), and transformers in learning to evolve the PDE forward in time [34, 56, 57, 58].  
 575 This has invoked interest in the development of reduced order models and learned representations for  
 576 time integration that decrease computational expense, while attempting to maintain solution accuracy.  
 577 Learning representations of the governing PDE can enable time-stepping in a latent space, where the  
 578 computational expense is substantially reduced [59]. Recently, for example, Lusch et al. have studied  
 579 learning the infinite-dimensional Koopman operator to globally linearize latent space dynamics [60].  
 580 Kim et al. have employed the Sparse Identification of Nonlinear Dynamics (SINDy) framework to  
 581 parameterize latent space trajectories and combine them with classical ODE solvers to integrate latent  
 582 space coordinates to arbitrary points in time [51]. Nguyen et al. have looked at the development of  
 583 foundation models for climate sciences using transformers pre-trained on well-established climate  
 584 datasets [7]. Other methods like dynamic mode decomposition (DMD) are entirely data-driven, and  
 585 find the best operator to estimate temporal dynamics [61]. Recent extensions of this work have also  
 586 considered learning equivalent operators, where physical constraints like energy conservation or the  
 587 periodicity of the boundary conditions are enforced [29].

588 **Self-supervised learning** All joint embedding self-supervised learning methods have a similar  
 589 objective: forming representations across a given domain of inputs that are invariant to a certain set of  
 590 transformations. Contrastive and non-contrastive methods are both used. Contrastive methods [21, 62,  
 591 63, 64, 65] push away unrelated pairs of augmented datapoints, and frequently rely on the InfoNCE  
 592 criterion [66], although in some cases, squared similarities between the embeddings have been  
 593 employed [67]. Clustering-based methods have also recently emerged [68, 69, 6], where instead  
 594 of contrasting pairs of samples, samples are contrasted with cluster centroids. Non-contrastive  
 595 methods [10, 38, 9, 70, 71, 72, 37] aim to bring together embeddings of positive samples. However,  
 596 the primary difference between contrastive and non-contrastive methods lies in how they prevent  
 597 representational collapse. In the former, contrasting pairs of examples are explicitly pushed away to  
 598 avoid collapse. In the latter, the criterion considers the set of embeddings as a whole, encouraging  
 599 information content maximization to avoid collapse. For example, this can be achieved by regularizing  
 600 the empirical covariance matrix of the embeddings. While there can be differences in practice, both  
 601 families have been shown to lead to very similar representations [16, 73]. An intriguing feature in  
 602 many SSL frameworks is the use of a projector neural network after the encoder, on top of which the  
 603 SSL loss is applied. The projector was introduced in [21]. Whereas the projector is not necessary for  
 604 these methods to learn a satisfactory representation, it is responsible for an important performance  
 605 increase. Its exact role is an object of study [74, 15].

606 **Equivariant networks and geometric deep learning** In the past several years, an extensive set  
 607 of literature has explored questions in the so-called realm of geometric deep learning tying together  
 608 aspects of group theory, geometry, and deep learning [75]. In one line of work, networks have  
 609 been designed to explicitly encode symmetries into the network via equivariant layers or explicitly  
 610 symmetric parameterizations [76, 77, 78, 79]. These techniques have notably found particular  
 611 application in chemistry and biology related problems [80, 81, 82] as well as learning on graphs  
 612 [83]. Another line of work considers optimization over layers or networks that are parameterized  
 613 over a Lie group [84, 85, 86, 87, 88]. Our work does not explicitly encode invariances or structurally  
 614 parameterize Lie groups into architectures as in many of these works, but instead tries to learn  
 615 representations that are approximately symmetric and invariant to these group structures via the SSL.  
 616 As mentioned in the main text, perhaps more relevant for future work are techniques for learning  
 617 equivariant features and maps [39, 40].

## 618 E Details on Augmentations

619 The generators of the Lie point symmetries of the various equations we study are listed below. For  
 620 symmetry augmentations which distort the periodic grid in space and time, we provide inputs  $x$  and  $t$   
 621 to the network which contain the new spatial and time coordinates after augmentation.

### 622 E.1 Burgers' equation

623 As a reminder, the Burgers' equation takes the form

$$u_t + uu_x - \nu u_{xx} = 0. \quad (49)$$

624 Lie point symmetries of the Burgers' equation are listed in Table 3. There are five generators. As we  
 625 will see, the first three generators corresponding to translations and Galilean boosts are consistent  
 626 with the other equations we study (KS, KdV, and Navier Stokes) as these are all flow equations.

Table 3: Generators of the Lie point symmetry group of the Burgers' equation in its standard form [42, 89].

|                           | Lie algebra generator                                         | Group operation<br>$(x, t, u) \mapsto$                                                    |
|---------------------------|---------------------------------------------------------------|-------------------------------------------------------------------------------------------|
| $g_1$ (space translation) | $\epsilon \partial_x$                                         | $(x + \epsilon, t, u)$                                                                    |
| $g_2$ (time translation)  | $\epsilon \partial_t$                                         | $(x, t + \epsilon, u)$                                                                    |
| $g_3$ (Galilean boost)    | $\epsilon(t\partial_x + \partial_u)$                          | $(x + \epsilon t, t, u + \epsilon)$                                                       |
| $g_4$ (scaling)           | $\epsilon(x\partial_x + 2t\partial_t - u\partial_u)$          | $(e^\epsilon x, e^{2\epsilon t}, e^{-\epsilon} u)$                                        |
| $g_5$ (projective)        | $\epsilon(xt\partial_x + t^2\partial_t + (x - tu)\partial_u)$ | $\left( \frac{x}{1 - \epsilon t}, \frac{t}{1 - \epsilon t}, u + \epsilon(x - tu) \right)$ |

627 **Comments and errata in [12]** As a cautionary note, the symmetry group given in Table 1 of [12]  
 628 for Burgers' equation is incorrectly labeled for Burgers' equation in its standard form. Instead, these  
 629 augmentations are those for Burgers' equation in its potential form, which is given as:

$$u_t + \frac{1}{2}u_x^2 - \nu u_{xx} = 0. \quad (50)$$

630 The potential form is often more convenient for analyzing symmetries of Burgers' equation. Burgers'  
 631 equation in its standard form is  $v_t + vv_x - \nu v_{xx} = 0$ , which can be obtained from the transformation  
 632  $v = u_x$ . The Lie point symmetry group of the equation in its potential form contains more generators  
 633 than that of the standard form. This is because translating all of these generators into the standard  
 634 form can lose the smoothness and locality of the transformations (some are no longer Lie point  
 635 transformations).

636 Fortunately, this error does not carry through in their experiments: [12] only consider input data as  
 637 solutions to Heat equation, which they subsequently transform into solutions of Burgers' equation  
 638 via a Cole-Hopf transform. Therefore, in their code, they apply augmentations using the symmetry  
 639 group of the Heat equation for which they have the correct symmetry group. We opted only to work  
 640 with solutions to Burgers' equations itself for a fairer comparison to real-world settings, where a  
 641 convenient transform to a linear PDE such as the Cole-Hopf transform is generally not available.

## 642 E.2 KdV

643 Lie point symmetries of the KdV equation are listed in Table 4. Though all the operations listed are  
 644 valid generators of the symmetry group, only  $g_1$  and  $g_3$  are invariant to the downstream task of the  
 645 inverse problem. (Notably, these parameters are independent of any spatial shift). Consequently,  
 646 during SSL pre-training for the inverse problem, only  $g_1$  and  $g_3$  were used for learning representations.  
 647 In contrast, for time-stepping, all listed symmetry groups were used.

Table 4: Generators of the Lie point symmetry group of the KdV equation. The only symmetries used in the inverse task of predicting initial conditions are  $g_1$  and  $g_3$  since the other two are not invariant to the downstream task.

|                           | Lie algebra generator                                 | Group operation<br>$(x, t, u) \mapsto$              |
|---------------------------|-------------------------------------------------------|-----------------------------------------------------|
| $g_1$ (space translation) | $\epsilon \partial_x$                                 | $(x + \epsilon, t, u)$                              |
| $g_2$ (time translation)  | $\epsilon \partial_t$                                 | $(x, t + \epsilon, u)$                              |
| $g_3$ (Galilean boost)    | $\epsilon(t\partial_x + \partial_u)$                  | $(x + \epsilon t, t, u + \epsilon)$                 |
| $g_4$ (scaling)           | $\epsilon(x\partial_x + 3t\partial_t - 2u\partial_u)$ | $(e^\epsilon x, e^{3\epsilon t}, e^{-2\epsilon} u)$ |

648 **E.3 KS**

649 Lie point symmetries of the KS equation are listed in Table 5. All of these symmetry generators are  
 650 shared with the KdV equation listed in Table 3. Similar to KdV, only  $g_1$  and  $g_3$  are invariant to the  
 651 downstream regression task of predicting the initial conditions. In addition, for time-stepping, all  
 652 symmetry groups were used in learning meaningful representations.

Table 5: Generators of the Lie point symmetry group of the KS equation. The only symmetries used in the inverse task of predicting initial conditions are  $g_1$  and  $g_3$  since  $g_2$  is not invariant to the downstream task.

|                           | Lie algebra generator                | Group operation<br>$(x, t, u) \mapsto$ |
|---------------------------|--------------------------------------|----------------------------------------|
| $g_1$ (space translation) | $\epsilon \partial_x$                | $(x + \epsilon, t, u)$                 |
| $g_2$ (time translation)  | $\epsilon \partial_t$                | $(x, t + \epsilon, u)$                 |
| $g_3$ (Galilean boost)    | $\epsilon(t\partial_x + \partial_u)$ | $(x + \epsilon t, t, u + \epsilon)$    |

653 **E.4 Navier Stokes**

654 Lie point symmetries of the incompressible Navier Stokes equation are listed in Table 6 [90].  
 655 As pressure is not given as an input to any of our networks, the symmetry  $g_q$  was not included  
 656 in our implementations. For augmentations  $g_{E_x}$  and  $g_{E_y}$ , we restricted attention only to linear  
 657  $E_x(t) = E_y(t) = t$  or quadratic  $E_x(t) = E_y(t) = t^2$  functions. This restriction was made to  
 658 maintain invariance to the downstream task of buoyancy force prediction in the linear case or easily  
 659 calculable perturbations to the buoyancy by an amount  $2\epsilon$  to the magnitude in the quadratic case.  
 660 Finally, we fix both order and steps parameters in our Lie-Trotter approximation implementation to 2  
 661 for computational efficiency.

662 **F Experimental details**

663 Whereas we implemented our own pretraining and evaluation (kinematic viscosity, initial conditions  
 664 and buoyancy) pipelines, we used the data generation and time-stepping code provided on Github  
 665 by [12] for Burgers’, KS and KdV, and in [18] for Navier-Stokes (MIT License), with slight modifica-  
 666 tion to condition the neural operators on our representation. All our code relies on Pytorch.  
 667 Note that the time-stepping code for Navier-Stokes uses Pytorch Lightning. We report the details  
 668 of the training cost and hyperparameters for pretraining and timestepping in Table 7 and Table 8  
 669 respectively.

670 **F.1 Experiments on Burgers’ Equation**

671 Solutions realizations of Burgers’ equation were generated using the analytical solution [32] obtained  
 672 from the Heat equation and the Cole-Hopf transform. During generation, kinematic viscosities,  $\nu$ ,  
 673 and initial conditions were varied.

674 **Representation pretraining** We pretrain a representation on subsets of our full dataset containing  
 675 10,000 1D time evolutions from Burgers equation with various kinematic viscosities,  $\nu$ , sampled  
 676 uniformly in the range  $[0.001, 0.007]$ , and initial conditions using a similar procedure to [12]. We  
 677 generate solutions of size  $224 \times 448$  in the spatial and temporal dimensions respectively, using the  
 678 default parameters from [12]. We train a ResNet18 [17] encoder using the VICReg [9] approach to  
 679 joint embedding SSL, with a smaller projector (width 512) since we use a smaller ResNet than in the  
 680 original paper. We keep the same variance, invariance and covariance parameters as in [9]. We use  
 681 the following augmentations and strengths:

- 682 • Crop of size  $(128, 256)$ , respectively, in the spatial and temporal dimension.
- 683 • Uniform sampling in  $[-2, 2]$  for the coefficient associated to  $g_1$ .
- 684 • Uniform sampling in  $[0, 2]$  for the coefficient associated to  $g_2$ .
- 685 • Uniform sampling in  $[-0.2, 0.2]$  for the coefficient associated to  $g_3$ .

Table 6: Generators of the Lie point symmetry group of the incompressible Navier Stokes equation. Here,  $u, v$  correspond to the velocity of the fluid in the  $x, y$  direction respectively and  $p$  corresponds to the pressure. The last three augmentations correspond to infinite dimensional Lie subgroups with choice of functions  $E_x(t), E_y(t), q(t)$  that depend on  $t$  only. For invariant tasks, we only used settings where  $E_x(t), E_y(t) = t$  (linear) or  $E_x(t), E_y(t) = t^2$  (quadratic) to ensure invariance to the downstream task or predictable changes in the outputs of the downstream task. These augmentations are listed as numbers 6 to 9.

|                                             | Lie algebra generator                                                                           | Group operation<br>$(x, y, t, u, v, p) \mapsto$                                                                                                      |
|---------------------------------------------|-------------------------------------------------------------------------------------------------|------------------------------------------------------------------------------------------------------------------------------------------------------|
| $g_1$ (time translation)                    | $\epsilon \partial_t$                                                                           | $(x, y, t + \epsilon, u, v, p)$                                                                                                                      |
| $g_2$ ( $x$ translation)                    | $\epsilon \partial_x$                                                                           | $(x + \epsilon, y, t, u, v, p)$                                                                                                                      |
| $g_3$ ( $y$ translation)                    | $\epsilon \partial_y$                                                                           | $(x, y + \epsilon, t, u, v, p)$                                                                                                                      |
| $g_4$ (scaling)                             | $\epsilon(2t\partial_t + x\partial_x + y\partial_y - u\partial_u - v\partial_v - 2p\partial_p)$ | $(e^\epsilon x, e^\epsilon y, e^{2\epsilon t}, e^{-\epsilon u}, e^{-\epsilon v}, e^{-2\epsilon p})$                                                  |
| $g_5$ (rotation)                            | $\epsilon(x\partial_y - y\partial_x + u\partial_v - v\partial_u)$                               | $(x \cos \epsilon - y \sin \epsilon, x \sin \epsilon + y \cos \epsilon, t, u \cos \epsilon - v \sin \epsilon, u \sin \epsilon + v \cos \epsilon, p)$ |
| $g_6$ ( $x$ linear boost) <sup>1</sup>      | $\epsilon(t\partial_x + \partial_u)$                                                            | $(x + \epsilon t, y, t, u + \epsilon, v, p)$                                                                                                         |
| $g_7$ ( $y$ linear boost) <sup>1</sup>      | $\epsilon(t\partial_y + \partial_v)$                                                            | $(x, y + \epsilon t, t, u, v + \epsilon, p)$                                                                                                         |
| $g_8$ ( $x$ quadratic boost) <sup>2</sup>   | $\epsilon(t^2\partial_x + 2t\partial_u - 2x\partial_p)$                                         | $(x + \epsilon t^2, y, t, u + 2\epsilon t, v, p - 2\epsilon x)$                                                                                      |
| $g_9$ ( $y$ quadratic boost) <sup>2</sup>   | $\epsilon(t^2\partial_y + 2t\partial_v - 2y\partial_p)$                                         | $(x, y + \epsilon t^2, t, u, v + 2\epsilon t, p - 2\epsilon y)$                                                                                      |
| $g_{E_x}$ ( $x$ general boost) <sup>3</sup> | $\epsilon(E_x(t)\partial_x + E'_x(t)\partial_u - xE''_x(t)\partial_p)$                          | $(x + \epsilon E_x(t), y, t, u + \epsilon E'_x(t), v, p - E''_x(t)x)$                                                                                |
| $g_{E_y}$ ( $y$ general boost) <sup>3</sup> | $\epsilon(E_y(t)\partial_y + E'_y(t)\partial_v - yE''_y(t)\partial_p)$                          | $(x, y + \epsilon E_y(t), t, u, v + \epsilon E'_y(t), p - E''_y(t)y)$                                                                                |
| $g_q$ (additive pressure) <sup>3</sup>      | $\epsilon q(t)\partial_p$                                                                       | $(x, y, t, u, v, p + q(t))$                                                                                                                          |

<sup>1</sup> case of  $g_{E_x}$  or  $g_{E_y}$  where  $E_x(t) = E_y(t) = t$  (linear function of  $t$ )

<sup>2</sup> case of  $g_{E_x}$  or  $g_{E_y}$  where  $E_x(t) = E_y(t) = t^2$  (quadratic function of  $t$ )

<sup>3</sup>  $E_x(t), E_y(t), q(t)$  can be any given smooth function that only depends on  $t$

686 • Uniform sampling in  $[-1, 1]$  for the coefficient associated to  $g_4$ .

687 We pretrain for 100 epochs using AdamW [33] and a batch size of 32. Crucially, we assess the quality  
688 of the learned representation via linear probing for kinematic viscosity regression, which we detail  
689 below.

690 **Kinematic viscosity regression** We evaluate the learned representation as follows: the ResNet18 is  
691 frozen and used as an encoder to produce features from the training dataset. The features are passed  
692 through a linear layer, followed by a sigmoid to constrain the output within  $[\nu_{\min}, \nu_{\max}]$ . The learned  
693 model is evaluated against our validation dataset, which is comprised of 2,000 samples.

694 **Time-stepping** We use a 1D CNN solver from [12] as our baseline. This neural solver takes  $T_p$   
695 previous time steps as input, to predict the next  $T_f$  future ones. Each channel (or spatial axis, if we  
696 view the input as a 2D image with one channel) is composed of the realization values,  $u$ , at  $T_p$  times,  
697 with spatial step size  $dx$ , and time step size  $dt$ . The dimension of the input is therefore  $(T_p + 2, 224)$ ,  
698 where the extra two dimensions are simply to capture the scalars  $dx$  and  $dt$ . We augment this input  
699 with our representation. More precisely, we select the encoder that allows for the most accurate  
700 linear regression of  $\nu$  with our validation dataset, feed it with the CNN operator input and reduce the  
701 resulting representation dimension to  $d$  with a learned projection before adding it as supplementary  
702 channels to the input, which is now  $(T_p + 2 + d, 224)$ .

703  
704 We set  $T_p = 20$ ,  $T_f = 20$ , and  $n_{\text{samples}} = 2,000$ . We train both models for 20 epochs fol-

705 lowing the setup from [12]. In addition, we use AdamW with a decaying learning rate and different  
706 configurations of 3 runs each:

- 707 • Batch size  $\in \{16, 64\}$ .
- 708 • Learning rate  $\in \{0.0001, 0.00005\}$ .

## 709 F.2 Experiments on KdV and KS

710 To obtain realizations of both the KdV and KS PDEs, we apply the method of lines, and compute  
711 spatial derivatives using a pseudo-spectral method, in line with the approach taken by [12].

712 **Representation pretraining** To train on realizations of KdV, we use the following VICReg param-  
713 eters:  $\lambda_{var} = 25$ ,  $\lambda_{inv} = 25$ , and  $\lambda_{cov} = 4$ . For the KS PDE, the  $\lambda_{var}$  and  $\lambda_{inv}$  remain unchanged,  
714 with  $\lambda_{cov} = 6$ . The pre-training is performed on a dataset comprised of 10,000 1D time evolutions of  
715 each PDE, each generated from initial conditions described in the main text. Generated solutions were  
716 of size  $128 \times 256$  in the spatial and temporal dimensions, respectively. Similar to Burgers' equation,  
717 a ResNet18 encoder in conjunction with a projector of width 512 was used for SSL pre-training. The  
718 following augmentations and strengths were applied:

- 719 • Crop of size  $(32, 256)$ , respectively, in the spatial and temporal dimension.
- 720 • Uniform sampling in  $[-0.2, 0.2]$  for the coefficient associated to  $g_3$ .

721 **Initial condition regression** The quality of the learned representations is evaluated by freezing the  
722 ResNet18 encoder, training a separate regression head to predict values of  $A_k$  and  $\omega_k$ , and comparing  
723 the NMSE to a supervised baseline. The regression head was a fully-connected network, where  
724 the output dimension is commensurate with the number of initial conditions used. In addition, a  
725 range-constrained sigmoid was added to bound the output between  $[-0.5, 2\pi]$ , where the bounds  
726 were informed by the minimum and maximum range of the sampled initial conditions. Lastly, similar  
727 to Burgers' equation, the validation dataset is comprised of 2,000 labeled samples.

728 **Time-stepping** The same 1D CNN solver used for Burgers' equation serves as the baseline for  
729 time-stepping the KdV and KS PDEs. We select the ResNet18 encoder based on the one that  
730 provides the most accurate predictions of the initial conditions with our validation set. Here, the  
731 input dimension is now  $(T_p + 2, 128)$  to agree with the size of the generated input data. Similarly  
732 to Burgers' equation,  $T_p = 20$ ,  $T_f = 20$ , and  $n_{samples} = 2,000$ . Lastly, AdamW with the same  
733 learning rate and batch size configurations as those seen for Burgers' equation were used across 3  
734 time-stepping runs each.

735 A sample visualization with predicted instances of the KdV PDE is provided in Fig. 7 be-  
736 low:

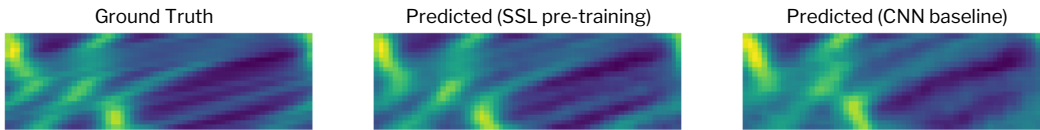

Figure 7: Illustration of the 20 predicted time steps for the KdV PDE. **(Left)** Ground truth data from PDE solver; **(Middle)** Predicted  $u(x, t)$  using learned representations; **(Right)** Predicted output from using the CNN baseline.

737

## 738 F.3 Experiments on Navier-Stokes

739 We use the Conditioning dataset for Navier Stokes-2D proposed in [18], consisting of 26,624 2D  
740 time evolutions with 56 time steps and various buoyancies ranging approximately uniformly from 0.2  
741 to 0.5.

Table 7: List of model hyperparameters and training details for the invariant tasks. Training time includes periodic evaluations during the pretraining.

| Equation             | Burgers'    | KdV          | KS           | Navier Stokes |
|----------------------|-------------|--------------|--------------|---------------|
| <i>Network:</i>      |             |              |              |               |
| Model                | ResNet18    | ResNet18     | ResNet18     | ResNet18      |
| Embedding Dim.       | 512         | 512          | 512          | 512           |
| <i>Optimization:</i> |             |              |              |               |
| Optimizer            | LARS [91]   | AdamW        | AdamW        | AdamW         |
| Learning Rate        | 0.6         | 0.3          | 0.3          | 3e-4          |
| Batch Size           | 32          | 64           | 64           | 64            |
| Epochs               | 100         | 100          | 100          | 100           |
| Nb of exps           | ~ 300       | ~ 30         | ~ 30         | ~ 300         |
| <i>Hardware:</i>     |             |              |              |               |
| GPU used             | Nvidia V100 | Nvidia M4000 | Nvidia M4000 | Nvidia V100   |
| Training time        | ~ 5h        | ~ 11h        | ~ 12h        | ~ 48h         |

Table 8: List of model hyperparameters and training details for the timestepping tasks.

| Equation                | Burgers'    | KdV          | KS           | Navier Stokes          |
|-------------------------|-------------|--------------|--------------|------------------------|
| <i>Neural Operator:</i> |             |              |              |                        |
| Model                   | CNN [12]    | CNN [12]     | CNN [12]     | Modified U-Net-64 [18] |
| <i>Optimization:</i>    |             |              |              |                        |
| Optimizer               | AdamW       | AdamW        | AdamW        | Adam                   |
| Learning Rate           | 1e-4        | 1e-4         | 1e-4         | 1e-3                   |
| Batch Size              | 16          | 16           | 16           | 64                     |
| Epochs                  | 20          | 20           | 20           | 50                     |
| <i>Hardware:</i>        |             |              |              |                        |
| GPU used                | Nvidia V100 | Nvidia M4000 | Nvidia M4000 | Nvidia V100 (8)        |
| Training time           | ~ 1d        | ~ 2d         | ~ 2d         | ~ 5d                   |

742 **Representation pretraining** We train a ResNet18 for 100 epochs with AdamW, a batch size of 64  
743 and a learning rate of 3e-4. We use the same VICReg hyperparameters as for Burgers' Equation. We  
744 use the following augmentations and strengths (augmentations whose strength is not specified here  
745 are not used):

- 746 • Crop of size (16, 128, 128), respectively in temporal, x and y dimensions.
- 747 • Uniform sampling in  $[-1, 1]$  for the coefficients associated to  $g_2$  and  $g_3$  (applied respectively  
748 in x and y).
- 749 • Uniform sampling in  $[-0.1, 0.1]$  for the coefficients associated to  $g_5$ .
- 750 • Uniform sampling in  $[-0.01, 0.01]$  for the coefficients associated to  $g_6$  and  $g_7$  (applied  
751 respectively in x and y).
- 752 • Uniform sampling in  $[-0.01, 0.01]$  for the coefficients associated to  $g_8$  and  $g_9$  (applied  
753 respectively in x and y).

754 **Buoyancy regression** We evaluate the learned representation as follows: the ResNet18 is frozen  
755 and used as an encoder to produce features from the training dataset. The features are passed through  
756 a linear layer, followed by a sigmoid to constrain the output within  $[\text{Buoyancy}_{\min}, \text{Buoyancy}_{\max}]$ .  
757 Both the fully supervised baseline (ResNet18 + linear head) and our (frozen ResNet18 + linear head)  
758 model are trained on 3, 328 unseen samples and evaluated against 6, 592 unseen samples.

759 **Time-stepping** We use smaller trajectories (32) as in [18] (56) to reduce computational burden.  
760 To condition on our representation, we simply replace the Fourier embedding of the buoyancy by a  
761 learned projection of our representation. We compare our conditioning to the parameter conditioning,  
762 and no conditioning. All methods are however conditioned on time, and use a single frame to predict  
763 a future one. We use the same base configuration as the one provided in [18] for conditioning with  
764 modified UNet-64, except we double the effective batch size (since we use 8 GPUs instead of 4) and  
765 thus increase the base learning rate to 1e-3. We also depart from [18] by evaluating the learned PDE  
766 surrogate at four subsequent time horizons:  $\{1, 2, 4, 8\}$ .

Table 9: Time-stepping MSE ( $\downarrow$ ) for Navier-Stokes on various time horizons.

| Time horizon             | 1                   | 2                   | 4                   | 8                   |
|--------------------------|---------------------|---------------------|---------------------|---------------------|
| <i>Method:</i>           |                     |                     |                     |                     |
| Time conditioned         | $0.0028 \pm 0.0001$ | $0.0035 \pm 0.0001$ | $0.0053 \pm 0.0001$ | $0.0106 \pm 0.0001$ |
| Time + Rep. cond. (ours) | $0.0008 \pm 0.0001$ | $0.0014 \pm 0.0001$ | $0.0032 \pm 0.0001$ | $0.0092 \pm 0.0001$ |
| Time + Param. cond.      | $0.0006 \pm 0.0001$ | $0.0013 \pm 0.0001$ | $0.0027 \pm 0.0001$ | $0.0091 \pm 0.0001$ |

767 **Time-stepping results.** We report our complete results after 20k iterations in Table 9.



768 In order for the appendix to be self-contained, we include references again at the end of the appendix.  
769 This reference numbering includes references that appear in the appendix, but not the main body of  
770 the paper.

## 771 References

- 772 [1] Mazier Raissi, Paris Perdikaris, and George E. Karniadakis. Physics-informed neural networks:  
773 A deep learning framework for solving forward and inverse problems involving nonlinear partial  
774 differential equations. *Journal of Computational Physics*, 378:686–707, 2019. ISSN 0021-9991.  
775 URL <https://doi.org/10.1016/j.jcp.2018.10.045>.
- 776 [2] George E. Karniadakis, Ioannis G. Kevrekidis, Lu Lu, Paris Perdikaris, Sifan Wang, and Liu  
777 Yang. Physics-informed machine learning. *Nature Reviews Physics*, 3(6):422–440, 2021. URL  
778 <https://doi.org/10.1038/s42254-021-00314-5>.
- 779 [3] Samuel H Rudy, Steven L Brunton, Joshua L Proctor, and J Nathan Kutz. Data-driven discovery  
780 of partial differential equations. *Science advances*, 3(4):e1602614, 2017.
- 781 [4] Steven L. Brunton, Joshua L. Proctor, and J. Nathan Kutz. Discovering governing equations  
782 from data by sparse identification of nonlinear dynamical systems. *Proceedings of the National  
783 Academy of Sciences*, 113(15):3932–3937, 2016. URL [https://doi.org/10.1073/pnas.  
784 1517384113](https://doi.org/10.1073/pnas.1517384113).
- 785 [5] Alec Radford, Jong Wook Kim, Chris Hallacy, Aditya Ramesh, Gabriel Goh, Sandhini Agarwal,  
786 Girish Sastry, Amanda Askell, Pamela Mishkin, Jack Clark, et al. Learning transferable visual  
787 models from natural language supervision. In *arXiv preprint arXiv:2103.00020*, 2021.
- 788 [6] Mathilde Caron, Hugo Touvron, Ishan Misra, Hervé Jégou, Julien Mairal, Piotr Bojanowski,  
789 and Armand Joulin. Emerging properties in self-supervised vision transformers. In *Proceedings  
790 of the IEEE/CVF International Conference on Computer Vision*, pages 9650–9660, 2021.
- 791 [7] Tung Nguyen, Johannes Brandstetter, Ashish Kapoor, Jayesh K Gupta, and Aditya Grover.  
792 ClimaX: A foundation model for weather and climate. *arXiv preprint arXiv:2301.10343*, 2023.
- 793 [8] Jane Bromley, Isabelle Guyon, Yann LeCun, Eduard Säckinger, and Roopak Shah. Signature  
794 verification using a " siamese" time delay neural network. *Advances in neural information  
795 processing systems*, 6, 1993.
- 796 [9] Adrien Bardes, Jean Ponce, and Yann LeCun. Vicreg: Variance-invariance-covariance regular-  
797 ization for self-supervised learning. *arXiv preprint arXiv:2105.04906*, 2021.
- 798 [10] Jean-Bastien Grill, Florian Strub, Florent Altché, Corentin Tallec, Pierre Richemond, Elena  
799 Buchatskaya, Carl Doersch, Bernardo Avila Pires, Zhaohan Guo, Mohammad Gheshlaghi Azar,  
800 et al. Bootstrap your own latent—a new approach to self-supervised learning. *NeurIPS*, 2020.
- 801 [11] Peter J. Olver. Symmetry groups and group invariant solutions of partial differential equations.  
802 *Journal of Differential Geometry*, 14:497–542, 1979.
- 803 [12] Johannes Brandstetter, Max Welling, and Daniel E Worrall. Lie point symmetry data augmenta-  
804 tion for neural pde solvers. *arXiv preprint arXiv:2202.07643*, 2022.
- 805 [13] Nail H Ibragimov. *CRC handbook of Lie group analysis of differential equations*, volume 3.  
806 CRC press, 1995.
- 807 [14] Gerd Baumann. *Symmetry analysis of differential equations with Mathematica®*. Springer  
808 Science & Business Media, 2000.
- 809 [15] Florian Bordes, Randall Balestriero, Quentin Garrido, Adrien Bardes, and Pascal Vincent.  
810 Guillotine regularization: Improving deep networks generalization by removing their head.  
811 *arXiv preprint arXiv:2206.13378*, 2022.
- 812 [16] Quentin Garrido, Yubei Chen, Adrien Bardes, Laurent Najman, and Yann Lecun. On the  
813 duality between contrastive and non-contrastive self-supervised learning. *arXiv preprint  
814 arXiv:2206.02574*, 2022.

- 815 [17] Kaiming He, Xiangyu Zhang, Shaoqing Ren, and Jian Sun. Deep residual learning for image  
816 recognition. In *Proceedings of the IEEE conference on computer vision and pattern recognition*,  
817 pages 770–778, 2016.
- 818 [18] Jayesh K Gupta and Johannes Brandstetter. Towards multi-spatiotemporal-scale generalized  
819 pde modeling. *arXiv preprint arXiv:2209.15616*, 2022.
- 820 [19] Victor Isakov. *Inverse problems for partial differential equations*, volume 127. Springer, 2006.
- 821 [20] Randall Balestriero, Mark Ibrahim, Vlad Sobal, Ari Morcos, Shashank Shekhar, Tom Goldstein,  
822 Florian Bordes, Adrien Bardes, Gregoire Mialon, Yuandong Tian, et al. A cookbook of  
823 self-supervised learning. *arXiv preprint arXiv:2304.12210*, 2023.
- 824 [21] Ting Chen, Simon Kornblith, Mohammad Norouzi, and Geoffrey Hinton. A simple framework  
825 for contrastive learning of visual representations. In *International conference on machine*  
826 *learning*, pages 1597–1607. PMLR, 2020.
- 827 [22] Hale F Trotter. On the product of semi-groups of operators. *Proceedings of the American*  
828 *Mathematical Society*, 10(4):545–551, 1959.
- 829 [23] Andrew M Childs, Yuan Su, Minh C Tran, Nathan Wiebe, and Shuchen Zhu. Theory of trotter  
830 error with commutator scaling. *Physical Review X*, 11(1):011020, 2021.
- 831 [24] Rishi Bommasani, Drew A Hudson, Ehsan Adeli, Russ Altman, Simran Arora, Sydney von  
832 Arx, Michael S Bernstein, Jeannette Bohg, Antoine Bosselut, Emma Brunskill, et al. On the  
833 opportunities and risks of foundation models. *arXiv preprint arXiv:2108.07258*, 2021.
- 834 [25] Nadav Brandes, Dan Ofer, Yam Peleg, Nadav Rappoport, and Michal Linial. Proteinbert:  
835 a universal deep-learning model of protein sequence and function. *Bioinformatics*, 38(8):  
836 2102–2110, 2022.
- 837 [26] Jianyi Yang, Ivan Anishchenko, Hahnbeom Park, Zhenling Peng, Sergey Ovchinnikov, and  
838 David Baker. Improved protein structure prediction using predicted interresidue orientations.  
839 *Proceedings of the National Academy of Sciences*, 117(3):1496–1503, 2020.
- 840 [27] Rui Wang, Robin Walters, and Rose Yu. Incorporating symmetry into deep dynamics models  
841 for improved generalization. *arXiv preprint arXiv:2002.03061*, 2020.
- 842 [28] Jack Richter-Powell, Yaron Lipman, and Ricky TQ Chen. Neural conservation laws: A  
843 divergence-free perspective. *arXiv preprint arXiv:2210.01741*, 2022.
- 844 [29] Peter J. Baddoo, Benjamin Herrmann, Beverley J. McKeon, J. Nathan Kutz, and Steven L.  
845 Brunton. Physics-informed dynamic mode decomposition (pidmd), 2021. URL [https://](https://arxiv.org/abs/2112.04307)  
846 [arxiv.org/abs/2112.04307](https://arxiv.org/abs/2112.04307).
- 847 [30] Marc Finzi, Ke Alexander Wang, and Andrew G Wilson. Simplifying hamiltonian and lagrangian  
848 neural networks via explicit constraints. *Advances in neural information processing systems*,  
849 33:13880–13889, 2020.
- 850 [31] Yuhan Chen, Takashi Matsubara, and Takaharu Yaguchi. Neural symplectic form: learn-  
851 ing hamiltonian equations on general coordinate systems. *Advances in Neural Information*  
852 *Processing Systems*, 34:16659–16670, 2021.
- 853 [32] Makoto Takamoto, Timothy Praditia, Raphael Leiteritz, Daniel MacKinlay, Francesco Alesiani,  
854 Dirk Pflüger, and Mathias Niepert. Pdebench: An extensive benchmark for scientific machine  
855 learning. *Advances in Neural Information Processing Systems*, 35:1596–1611, 2022.
- 856 [33] Ilya Loshchilov and Frank Hutter. Decoupled weight decay regularization. *arXiv preprint*  
857 *arXiv:1711.05101*, 2017.
- 858 [34] Yohai Bar-Sinai, Stephan Hoyer, Jason Hickey, and Michael P. Brenner. Learning data-driven  
859 discretizations for partial differential equations. *Proceedings of the National Academy of Sci-*  
860 *ences*, 116(31):15344–15349, 2019. URL <https://doi.org/10.1073/pnas.1814058116>.

- 861 [35] Mert Bulent Sariyildiz, Yannis Kalantidis, Karteek Alahari, and Diane Larlus. No reason for no  
862 supervision: Improved generalization in supervised models. In *International Conference on*  
863 *Learning Representations*, 2023.
- 864 [36] Maxime Oquab, Timothée Darcet, Théo Moutakanni, Huy Vo, Marc Szafraniec, Vasil Khalidov,  
865 Pierre Fernandez, Daniel Haziza, Francisco Massa, Alaaeldin El-Nouby, et al. Dinov2: Learning  
866 robust visual features without supervision. *arXiv preprint arXiv:2304.07193*, 2023.
- 867 [37] Adrien Bardes, Jean Ponce, and Yann LeCun. VICRegL: Self-supervised learning of local visual  
868 features. In Alice H. Oh, Alekh Agarwal, Danielle Belgrave, and Kyunghyun Cho, editors,  
869 *Advances in Neural Information Processing Systems*, 2022. URL [https://openreview.net/](https://openreview.net/forum?id=ePZsWeGJXyp)  
870 [forum?id=ePZsWeGJXyp](https://openreview.net/forum?id=ePZsWeGJXyp).
- 871 [38] Xinlei Chen and Kaiming He. Exploring simple siamese representation learning. In *CVPR*,  
872 2020.
- 873 [39] Robin Winter, Marco Bertolini, Tuan Le, Frank Noe, and Djork-Arné Clevert. Un-  
874 supervised learning of group invariant and equivariant representations. In S. Koyejo,  
875 S. Mohamed, A. Agarwal, D. Belgrave, K. Cho, and A. Oh, editors, *Advances in Neu-*  
876 *ral Information Processing Systems*, volume 35, pages 31942–31956. Curran Associates,  
877 Inc., 2022. URL [https://proceedings.neurips.cc/paper\\_files/paper/2022/file/](https://proceedings.neurips.cc/paper_files/paper/2022/file/cf3d7d8e79703fe947deffb587a83639-Paper-Conference.pdf)  
878 [cf3d7d8e79703fe947deffb587a83639-Paper-Conference.pdf](https://proceedings.neurips.cc/paper_files/paper/2022/file/cf3d7d8e79703fe947deffb587a83639-Paper-Conference.pdf).
- 879 [40] Quentin Garrido, Laurent Najman, and Yann Lecun. Self-supervised learning of split invariant  
880 equivariant representations. *arXiv preprint arXiv:2302.10283*, 2023.
- 881 [41] Janpou Nee and Jinqiao Duan. Limit set of trajectories of the coupled viscous burgers' equations.  
882 *Applied mathematics letters*, 11(1):57–61, 1998.
- 883 [42] Peter J Olver. Symmetry groups and group invariant solutions of partial differential equations.  
884 *Journal of Differential Geometry*, 14(4):497–542, 1979.
- 885 [43] Andrew Baker. *Matrix groups: An introduction to Lie group theory*. Springer Science &  
886 Business Media, 2003.
- 887 [44] John D Dollard, Charles N Friedman, and Pesi Rustom Masani. *Product integration with*  
888 *applications to differential equations*, volume 10. Westview Press, 1979.
- 889 [45] Masuo Suzuki. General theory of fractal path integrals with applications to many-body theories  
890 and statistical physics. *Journal of Mathematical Physics*, 32(2):400–407, 1991.
- 891 [46] Robert I McLachlan and G Reinout W Quispel. Splitting methods. *Acta Numerica*, 11:341–434,  
892 2002.
- 893 [47] Stéphane Descombes and Mechthild Thälhammer. An exact local error representation of  
894 exponential operator splitting methods for evolutionary problems and applications to linear  
895 schrödinger equations in the semi-classical regime. *BIT Numerical Mathematics*, 50(4):729–749,  
896 2010.
- 897 [48] Klaus-Jochen Engel, Rainer Nagel, and Simon Brendle. *One-parameter semigroups for linear*  
898 *evolution equations*, volume 194. Springer, 2000.
- 899 [49] Claudia Canzi and Graziano Guerra. A simple counterexample related to the lie–trotter product  
900 formula. In *Semigroup Forum*, volume 84, pages 499–504. Springer, 2012.
- 901 [50] Mahdi Ramezanizadeh, Mohammad Hossein Ahmadi, Mohammad Alhuyi Nazari, Milad  
902 Sadeghzadeh, and Lingen Chen. A review on the utilized machine learning approaches for  
903 modeling the dynamic viscosity of nanofluids. *Renewable and Sustainable Energy Reviews*,  
904 114:109345, 2019.
- 905 [51] William D Fries, Xiaolong He, and Youngsoo Choi. Lasdi: Parametric latent space dynamics  
906 identification. *Computer Methods in Applied Mechanics and Engineering*, 399:115436, 2022.

- 907 [52] Xiaolong He, Youngsoo Choi, William D Fries, Jon Belof, and Jiun-Shyan Chen. glasdi:  
908 Parametric physics-informed greedy latent space dynamics identification. *arXiv preprint*  
909 *arXiv:2204.12005*, 2022.
- 910 [53] Rahmad Syah, Naeim Ahmadian, Marischa Elveny, SM Alizadeh, Meysam Hosseini, and  
911 Afrasyab Khan. Implementation of artificial intelligence and support vector machine learning  
912 to estimate the drilling fluid density in high-pressure high-temperature wells. *Energy Reports*,  
913 7:4106–4113, 2021.
- 914 [54] Ricardo Vinuesa and Steven L Brunton. Enhancing computational fluid dynamics with machine  
915 learning. *Nature Computational Science*, 2(6):358–366, 2022.
- 916 [55] Maziar Raissi, Alireza Yazdani, and George Em Karniadakis. Hidden fluid mechanics: Learning  
917 velocity and pressure fields from flow visualizations. *Science*, 367(6481):1026–1030, 2020.
- 918 [56] Ehsan Adeli, Luning Sun, Jianxun Wang, and Alexandros A Taflanidis. An advanced spatio-  
919 temporal convolutional recurrent neural network for storm surge predictions. *arXiv preprint*  
920 *arXiv:2204.09501*, 2022.
- 921 [57] Pin Wu, Feng Qiu, Weibing Feng, Fangxing Fang, and Christopher Pain. A non-intrusive  
922 reduced order model with transformer neural network and its application. *Physics of Fluids*, 34  
923 (11):115130, 2022.
- 924 [58] Léonard Equer, T. Konstantin Rusch, and Siddhartha Mishra. Multi-scale message passing  
925 neural pde solvers, 2023. URL <https://arxiv.org/abs/2302.03580>.
- 926 [59] Byungsoo Kim, Vinicius C Azevedo, Nils Thuerey, Theodore Kim, Markus Gross, and Barbara  
927 Solenthaler. Deep fluids: A generative network for parameterized fluid simulations. In *Computer*  
928 *graphics forum*, volume 38(2), pages 59–70. Wiley Online Library, 2019.
- 929 [60] Bethany Lusch, J Nathan Kutz, and Steven L Brunton. Deep learning for universal linear  
930 embeddings of nonlinear dynamics. *Nature communications*, 9(1):4950, 2018.
- 931 [61] Peter J Schmid. Dynamic mode decomposition of numerical and experimental data. *Journal of*  
932 *fluid mechanics*, 656:5–28, 2010.
- 933 [62] Kaiming He, Haoqi Fan, Yuxin Wu, Saining Xie, and Ross Girshick. Momentum contrast for  
934 unsupervised visual representation learning. In *Proceedings of the IEEE/CVF conference on*  
935 *computer vision and pattern recognition*, pages 9729–9738, 2020.
- 936 [63] Xinlei Chen, Haoqi Fan, Ross Girshick, and Kaiming He. Improved baselines with momentum  
937 contrastive learning. *arXiv preprint arXiv:2003.04297*, 2020.
- 938 [64] Xinlei Chen, Saining Xie, and Kaiming He. An empirical study of training self-supervised  
939 vision transformers. In *ICCV*, 2021.
- 940 [65] Chun-Hsiao Yeh, Cheng-Yao Hong, Yen-Chi Hsu, Tyng-Luh Liu, Yubei Chen, and Yann LeCun.  
941 Decoupled contrastive learning. *arXiv preprint arXiv:2110.06848*, 2021.
- 942 [66] Aaron van den Oord, Yazhe Li, and Oriol Vinyals. Representation learning with contrastive  
943 predictive coding. *arXiv preprint arXiv:1807.03748*, 2018.
- 944 [67] Jeff Z HaoChen, Colin Wei, Adrien Gaidon, and Tengyu Ma. Provable guarantees for self-  
945 supervised deep learning with spectral contrastive loss. *NeurIPS*, 34, 2021.
- 946 [68] Mathilde Caron, Piotr Bojanowski, Armand Joulin, and Matthijs Douze. Deep clustering for  
947 unsupervised learning. In *ECCV*, 2018.
- 948 [69] Mathilde Caron, Ishan Misra, Julien Mairal, Priya Goyal, Piotr Bojanowski, and Armand Joulin.  
949 Unsupervised learning of visual features by contrasting cluster assignments. In *NeurIPS*, 2020.
- 950 [70] Jure Zbontar, Li Jing, Ishan Misra, Yann LeCun, and Stéphane Deny. Barlow twins: Self-  
951 supervised learning via redundancy reduction. In *ICML*, pages 12310–12320. PMLR, 2021.

- 952 [71] Aleksandr Ermolov, Aliaksandr Siarohin, Enver Sangineto, and Nicu Sebe. Whitening for  
953 self-supervised representation learning, 2021.
- 954 [72] Zengyi Li, Yubei Chen, Yann LeCun, and Friedrich T Sommer. Neural manifold clustering and  
955 embedding. *arXiv preprint arXiv:2201.10000*, 2022.
- 956 [73] Vivien Cabannes, Bobak T Kiani, Randall Balestriero, Yann LeCun, and Alberto Bietti. The ssl  
957 interplay: Augmentations, inductive bias, and generalization. *arXiv preprint arXiv:2302.02774*,  
958 2023.
- 959 [74] Grégoire Mialon, Randall Balestriero, and Yann Lecun. Variance-covariance regulariza-  
960 tion enforces pairwise independence in self-supervised representations. *arXiv preprint*  
961 *arXiv:2209.14905*, 2022.
- 962 [75] Michael M Bronstein, Joan Bruna, Taco Cohen, and Petar Veličković. Geometric deep learning:  
963 Grids, groups, graphs, geodesics, and gauges. *arXiv preprint arXiv:2104.13478*, 2021.
- 964 [76] Manzil Zaheer, Satwik Kottur, Siamak Ravanbakhsh, Barnabas Poczos, Russ R Salakhutdinov,  
965 and Alexander J Smola. Deep sets. *Advances in neural information processing systems*, 30,  
966 2017.
- 967 [77] Risi Kondor and Shubhendu Trivedi. On the generalization of equivariance and convolution  
968 in neural networks to the action of compact groups. In *International Conference on Machine*  
969 *Learning*, pages 2747–2755. PMLR, 2018.
- 970 [78] Taco Cohen and Max Welling. Group equivariant convolutional networks. In *International*  
971 *conference on machine learning*, pages 2990–2999. PMLR, 2016.
- 972 [79] Victor Garcia Satorras, Emiel Hoogeboom, and Max Welling. E (n) equivariant graph neural  
973 networks. In *International conference on machine learning*, pages 9323–9332. PMLR, 2021.
- 974 [80] John Jumper, Richard Evans, Alexander Pritzel, Tim Green, Michael Figurnov, Olaf Ron-  
975 neberger, Kathryn Tunyasuvunakool, Russ Bates, Augustin Žídek, Anna Potapenko, et al.  
976 Highly accurate protein structure prediction with alphafold. *Nature*, 596(7873):583–589, 2021.
- 977 [81] Nathaniel Thomas, Tess Smidt, Steven Kearnes, Lusann Yang, Li Li, Kai Kohlhoff, and Patrick  
978 Riley. Tensor field networks: Rotation-and translation-equivariant neural networks for 3d point  
979 clouds. *arXiv preprint arXiv:1802.08219*, 2018.
- 980 [82] James Kirkpatrick, Brendan McMorrow, David HP Turban, Alexander L Gaunt, James S  
981 Spencer, Alexander GDG Matthews, Annette Obika, Louis Thiry, Meire Fortunato, David Pfau,  
982 et al. Pushing the frontiers of density functionals by solving the fractional electron problem.  
983 *Science*, 374(6573):1385–1389, 2021.
- 984 [83] Jie Zhou, Ganqu Cui, Shengding Hu, Zhengyan Zhang, Cheng Yang, Zhiyuan Liu, Lifeng  
985 Wang, Changcheng Li, and Maosong Sun. Graph neural networks: A review of methods and  
986 applications. *AI open*, 1:57–81, 2020.
- 987 [84] Jonathan Masci, Davide Boscaini, Michael Bronstein, and Pierre Vandergheynst. Geodesic con-  
988 volutional neural networks on riemannian manifolds. In *Proceedings of the IEEE international*  
989 *conference on computer vision workshops*, pages 37–45, 2015.
- 990 [85] Jun Li, Li Fuxin, and Sinisa Todorovic. Efficient riemannian optimization on the stiefel manifold  
991 via the cayley transform. *arXiv preprint arXiv:2002.01113*, 2020.
- 992 [86] Bobak Kiani, Randall Balestriero, Yann Lecun, and Seth Lloyd. projunn: efficient method for  
993 training deep networks with unitary matrices. *arXiv preprint arXiv:2203.05483*, 2022.
- 994 [87] Zhengdao Chen, Jianyu Zhang, Martin Arjovsky, and Léon Bottou. Symplectic recurrent neural  
995 networks. *arXiv preprint arXiv:1909.13334*, 2019.
- 996 [88] Martin Arjovsky, Amar Shah, and Yoshua Bengio. Unitary evolution recurrent neural networks.  
997 In *International conference on machine learning*, pages 1120–1128. PMLR, 2016.

- 998 [89] Turgut Öziş and İSMAİL Aslan. Similarity solutions to burgers' equation in terms of special  
999 functions of mathematical physics. *Acta Physica Polonica B*, 2017.
- 1000 [90] SP Lloyd. The infinitesimal group of the navier-stokes equations. *Acta Mechanica*, 38(1-2):  
1001 85–98, 1981.
- 1002 [91] Yang You, Igor Gitman, and Boris Ginsburg. Large batch training of convolutional networks.  
1003 *arXiv preprint arXiv:1708.03888*, 2017.
